# Supplementary material for: The Tissue-Specific RNA Binding Protein T-STAR Controls Regional Splicing Patterns of Neurexin Pre-mRNAs in the Brain
Source: PubMed Central journal article supplement (PMC3636136; doi:10.1371/journal.pgen.1003474), 2013-04-25
Supplement: pgen.1003474.s003.pdf [file pgen.1003474.s003.pdf]

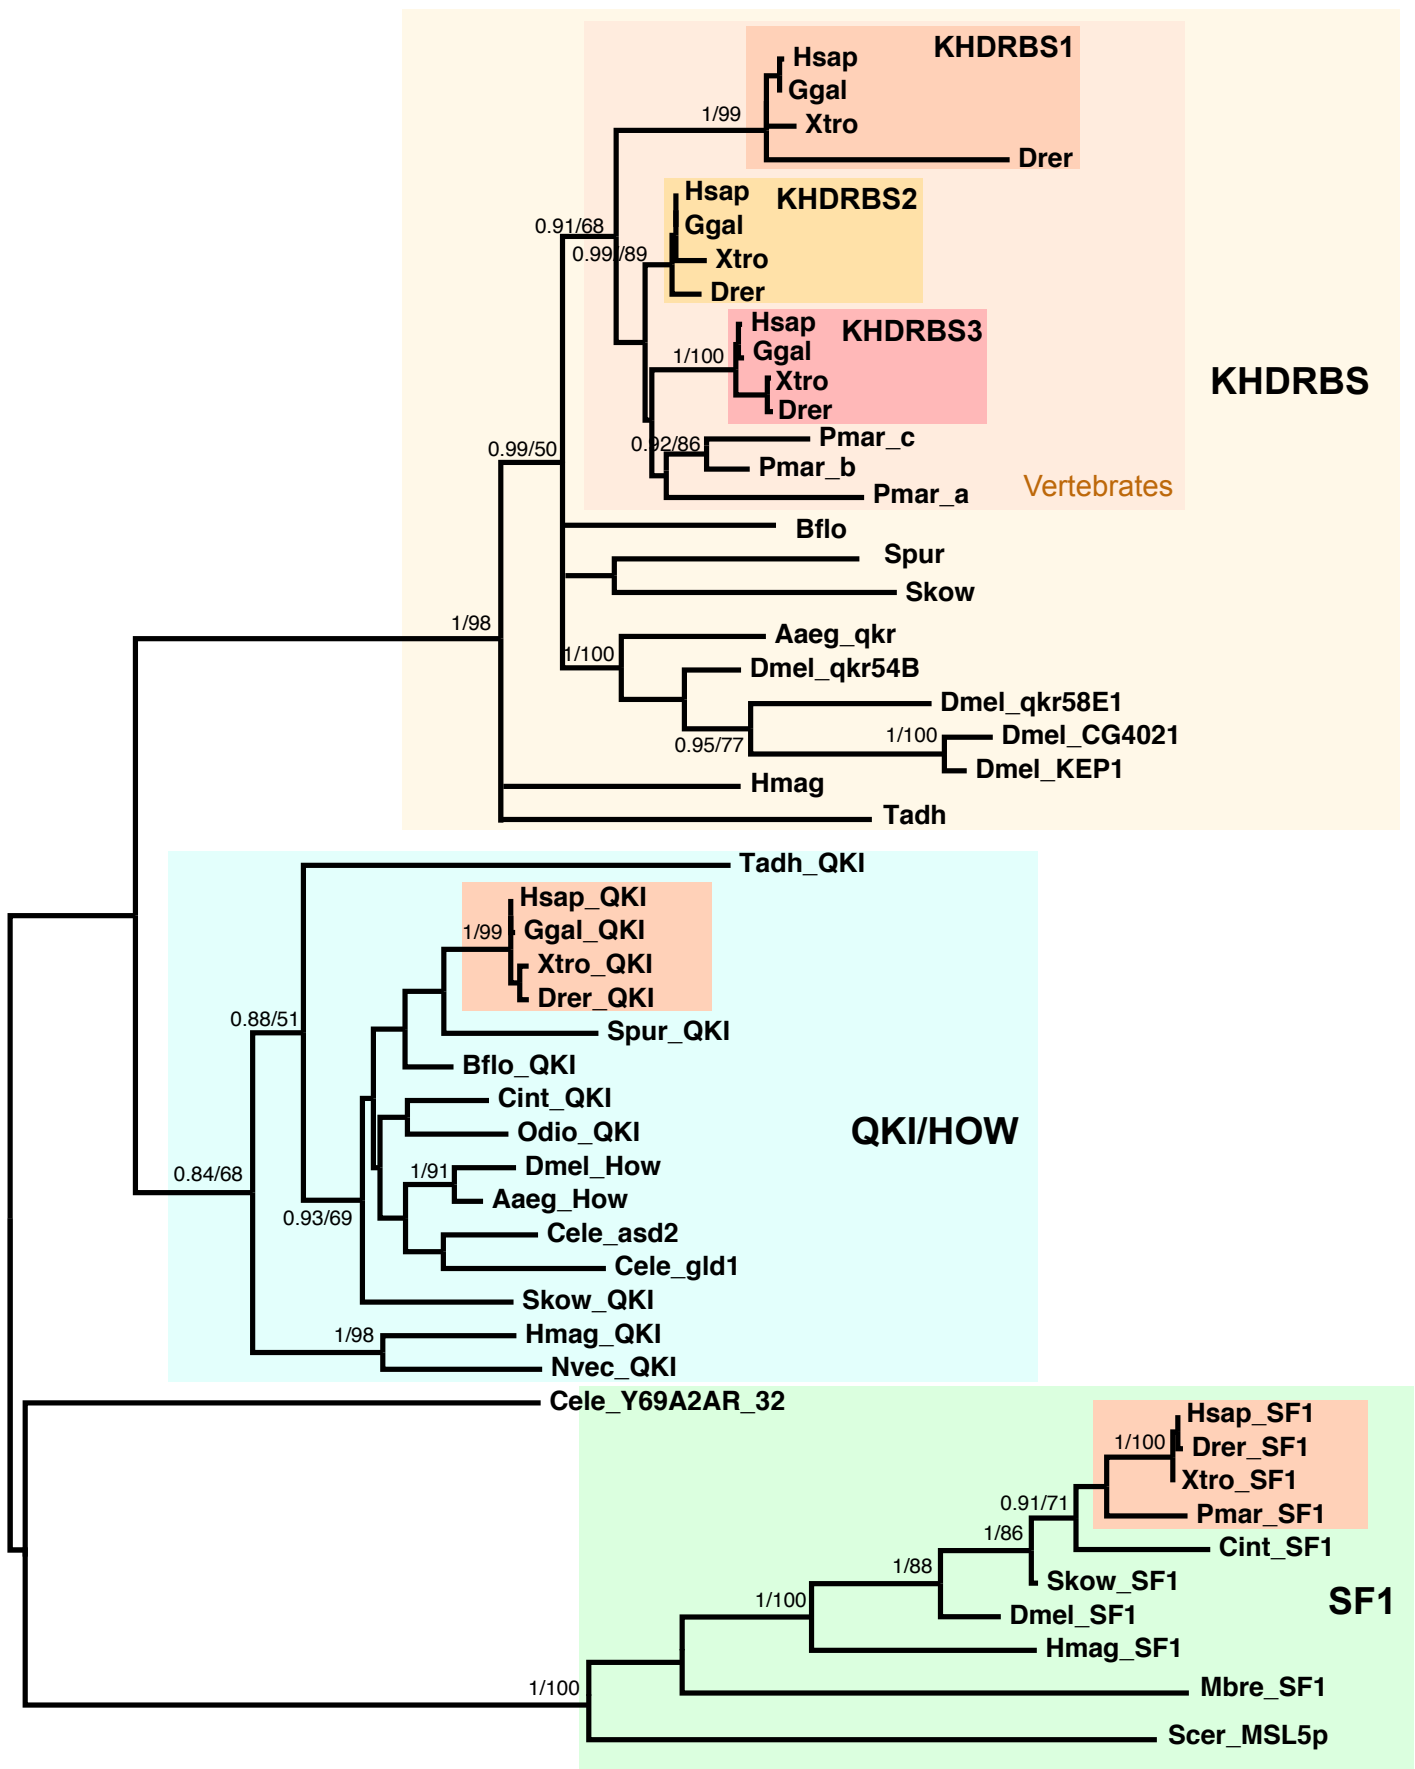

Figure S1 -Elliott
