# Supplementary material for: The Tissue-Specific RNA Binding Protein T-STAR Controls Regional Splicing Patterns of Neurexin Pre-mRNAs in the Brain
Source: PubMed Central journal article supplement (PMC3636136; doi:10.1371/journal.pgen.1003474), 2013-04-25
Supplement: pgen.1003474.s006.pdf [file pgen.1003474.s006.pdf]

| Full-length genes: |          |         | Observed | Expected  | Variance | z-score         |
|--------------------|----------|---------|----------|-----------|----------|-----------------|
| HsNRXN1            | TWAA     |         | 21852    | 21655.195 | 9780.823 | 1.99            |
| HsNRXN1            | TTAA     | deficit | 10352    | 11799.685 | 9804.668 | <b>-14.6203</b> |
| HsNRXN1            | TWAATWAA |         | 477      | 474.426   | 485.435  | 0.1168          |
| HsNRXN1            | TTAATTAA | deficit | 89       | 125.188   | 127.129  | <b>-3.2095</b>  |
| HsNRXN2            | TWAA     |         | 481      | 532.419   | 575.734  | -2.143          |
| HsNRXN2            | TTAA     | deficit | 231      | 291.576   | 270.996  | <b>-3.6798</b>  |
| HsNRXN2            | TWAATWAA | excess  | 9        | 2.608     | 2.63     | <b>3.9419</b>   |
| HsNRXN2            | TTAATTAA | excess  | 6        | 0.782     | 0.786    | <b>5.8863</b>   |
| HsNRXN3            | TWAA     |         | 24573    | 24670.899 | 11713.26 | -0.9046         |
| HsNRXN3            | TTAA     | deficit | 11333    | 13810.078 | 11768.11 | <b>-22.8342</b> |
| HsNRXN3            | TWAATWAA |         | 530      | 541.366   | 550.429  | -0.4844         |
| HsNRXN3            | TTAATTAA | deficit | 103      | 123.753   | 38.36    | <b>-3.3507</b>  |

From the (-1) exon to the (+1) exon

|        |          |         |     |         |         |                |
|--------|----------|---------|-----|---------|---------|----------------|
| NRXN1r | TWAA     |         | 810 | 840.088 | 793.521 | -1.0681        |
| NRXN1r | TTAA     | deficit | 369 | 419.722 | 347.302 | <b>-2.7217</b> |
| NRXN1r | TWAATWAA |         | 10  | 18.463  | 18.907  | -1.9464        |
| NRXN1r | TTAATTAA |         | 1   | 4.609   | 4.682   | -1.6678        |
| NRXN2r | TWAA     | excess  | 78  | 45.101  | 48.204  | <b>4.7385</b>  |
| NRXN2r | TTAA     | excess  | 33  | 20.972  | 19.498  | <b>2.7239</b>  |
| NRXN2r | TWAATWAA | excess  | 5   | 0.26    | 0.262   | <b>9.2572</b>  |
| NRXN2r | TTAATTAA | excess  | 4   | 0.056   | 0.056   | <b>16.6034</b> |
| NRXN3r | TWAA     |         | 690 | 654.69  | 631.784 | 1.4048         |
| NRXN3r | TTAA     |         | 330 | 332.5   | 279.187 | -0.1496        |
| NRXN3r | TWAATWAA |         | 14  | 12.547  | 12.828  | 0.4056         |
| NRXN3r | TTAATTAA |         | 5   | 3.236   | 3.283   | 0.9733         |
